# Supplementary material for: Resurrecting biodiversity: advanced assisted reproductive technologies and biobanking
Source: PubMed Central journal article supplement — Reprod Fertil. 2022 Jun 30;3(3):R121–46. doi: 10.1530/RAF-22-0005 (PMC9346332; doi:10.1530/raf-22-0005), 2022-06-30
Supplement: supplementary_table_1.pdf [file supplementary_table_1.pdf]

| <b>Acronym</b>                            | <b>Definition</b>                                                                                                                          |
|-------------------------------------------|--------------------------------------------------------------------------------------------------------------------------------------------|
| ART                                       | Assisted reproductive technology                                                                                                           |
| aART                                      | Advanced assisted reproductive technology                                                                                                  |
| AI                                        | Artificial insemination                                                                                                                    |
| CPA                                       | Cryoprotective agent                                                                                                                       |
| ET                                        | Embryo transfer                                                                                                                            |
| ICM                                       | Inner cell mass                                                                                                                            |
| ICSI                                      | Intra cytoplasmic sperm injection                                                                                                          |
| iPS cells                                 | Induced pluripotent stem cells                                                                                                             |
| IUCN                                      | International Union for the Conservation of Nature                                                                                         |
| IVF                                       | <i>In vitro</i> fertilisation                                                                                                              |
| SCNT                                      | Somatic cell nuclear transfer                                                                                                              |
| iSCNT                                     | Interspecific somatic cell nuclear transfer                                                                                                |
|                                           |                                                                                                                                            |
| <b>Term</b>                               | <b>Definition</b>                                                                                                                          |
| Assisted reproductive technology          | Technologies that utilise oocytes and spermatozoa to generate offspring (for example, AI, IVF, ET and ICSI)                                |
| Advanced assisted reproductive technology | Technologies that utilise genetic material from cells other than gametes to generate offspring (for example, SCNT/iSCNT, iPS cells)        |
| Biobank                                   | A secure, organised and searchable collection of biological samples and associated data stored for future use                              |
| Cryopreservation                          | The process of freezing cells with cryoprotectants enabling long-term viable storage using liquid nitrogen at -196°C or ultra-low freezers |
| Cryobank                                  | A biobank of viable, cryopreserved biological samples                                                                                      |
